# Supplementary material
Source: MDPI journal article supplement (https://www.mdpi.com/2673-4389/3/4/47)
Supplement: s1 [file s1]

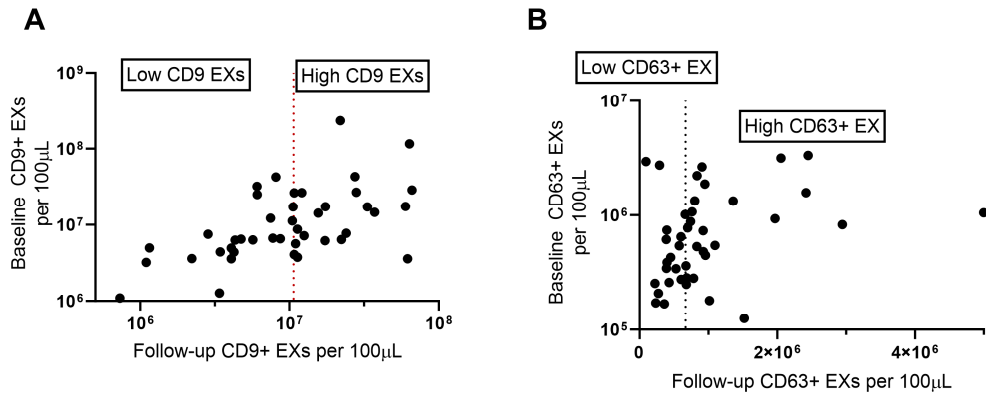

**Figure S1.** Baseline and Post-Treatment Exosome Shedding. (A) CD9<sup>+</sup> and (B) CD63<sup>+</sup> purified exosomes from patients with HCC at baseline and post-treatment. Abbreviations: Exosomes (EXs).

**Table S1.** Exosome shedding by first cycle response to LDT in HCC.

| EXs Shedding by Response                                  | Baseline                                                           | Post-LDT                                                           | <i>P</i> value |
|-----------------------------------------------------------|--------------------------------------------------------------------|--------------------------------------------------------------------|----------------|
| <b>CD9<sup>+</sup> EXs, median (IQR)</b>                  |                                                                    |                                                                    |                |
| ORR                                                       | 8.8×10 <sup>6</sup> (4.0×10 <sup>6</sup> – 25.7×10 <sup>6</sup> )  | 10.8×10 <sup>6</sup> (5.4×10 <sup>6</sup> – 22.0×10 <sup>6</sup> ) | 0.461          |
| Non-ORR                                                   | 5.0×10 <sup>6</sup> (3.1×10 <sup>6</sup> – 9.9×10 <sup>6</sup> )   | 4.1×10 <sup>6</sup> (2.8×10 <sup>6</sup> – 7.5×10 <sup>6</sup> )   | 0.534          |
| <b>CD63<sup>+</sup> EXs, median (IQR)</b>                 |                                                                    |                                                                    |                |
| ORR                                                       | 0.55×10 <sup>6</sup> (0.3×10 <sup>6</sup> – 1.0×10 <sup>6</sup> )  | 0.7×10 <sup>6</sup> (0.4×10 <sup>6</sup> – 0.9×10 <sup>6</sup> )   | 0.888          |
| Non-ORR                                                   | 0.55×10 <sup>6</sup> (0.3×10 <sup>6</sup> – 1.6×10 <sup>6</sup> )  | 0.8×10 <sup>6</sup> (0.36×10 <sup>6</sup> – 1.1×10 <sup>6</sup> )  | 0.759          |
| <b>CD9<sup>+</sup> CD63<sup>+</sup> EXs, median (IQR)</b> |                                                                    |                                                                    |                |
| ORR                                                       | 0.09×10 <sup>6</sup> (0.03×10 <sup>6</sup> – 0.2×10 <sup>6</sup> ) | 0.1×10 <sup>6</sup> (0.04×10 <sup>6</sup> – 0.4×10 <sup>6</sup> )  | 0.354          |
| Non-ORR                                                   | 0.08×10 <sup>6</sup> (0.02×10 <sup>6</sup> – 0.5×10 <sup>6</sup> ) | 0.08×10 <sup>6</sup> (0.05×10 <sup>6</sup> – 0.5×10 <sup>6</sup> ) | 0.471          |

Abbreviations: Interquartile range (IQR); Hepatocellular carcinoma (HCC); Liver-directed therapy (LDT); Exosomes (EXs); Objective response rate (ORR).
